# Supplementary material for: Evaluation of Nutritional Substances and Investigation of Antioxidant and Antimicrobial Potentials of Boerhavia diffusa with in Silico Molecular Docking
Source: MDPI journal article supplement (doi:10.3390/molecules27041280), 2022-02-14
Supplement: s1 [file s1]

**Table S1.** Compound extracted from *B. diffusa* retrieved from GCMS.

| Sl No | PUBCHEM_CO<br>MPOUND_CID | Compound Name                                                                                                   |
|-------|--------------------------|-----------------------------------------------------------------------------------------------------------------|
| 1     | 6329967                  | 1,3,5,7,9-Pentaethylbicyclo[5.3.1]pentasiloxane.1                                                               |
| 2     | 632001                   | Piperazine-1-ethanol, 4-(2-diethylaminosulfonyl-4-nitrophenyl)-.1                                               |
| 3     | 631968                   | (-)-Epinephrine, 3TMS derivative.1                                                                              |
| 4     | 348969051                | ((1-Hydroxyethylidene)malonic acid diethyl ester).1                                                             |
| 5     | 10917006                 | (25R)-22alpha,26-Epithiofurost-5-en-3beta-ol.1                                                                  |
| 6     | 5364290                  | (Z)-Difluorodiazene.1                                                                                           |
| 7     | 634748                   | [trans(trans)]-4-(4-Pentylcyclohexyl)-4'-(4-propylcyclohexyl)biphenyl.1                                         |
| 8     | 523469                   | 1-(Trihexylsilyloxy)decane.1                                                                                    |
| 9     | 15373                    | 1-Chloro-1-fluoroethane.1                                                                                       |
| 10    | 31370                    | 1-Chloro-2-propanol.1                                                                                           |
| 11    | 111843                   | 1-Ethoxyhexane.1                                                                                                |
| 12    | 236167                   | 1-Hydrazino-2-propanol.1                                                                                        |
| 13    | 7900                     | 1-Methoxy-2-propanol.1                                                                                          |
| 14    | 136819                   | 1,2,3-Triphenylazulene.1                                                                                        |
| 15    | 635680                   | 1,2,4,5-Tetraaza-3,6-disilacyclohexane, 3,6-dimethyl-1,2,4,5-tetraphenyl-3,6-divinyl-.1                         |
| 16    | 6329965                  | 1,3,5,7-Tetraethyl-1-ethylbutoxysiloxycyclo-tetrasiloxane.1                                                     |
| 17    | 635668                   | 1,3,5,7,9,11-Hexaethyl-5,9-dimethoxytricyclo[5.5.1.1(3,11)]hexasiloxane.1                                       |
| 18    | 6329968                  | 1,3,5,7,9,11-Hexaethylcyclohexasiloxane.1                                                                       |
| 19    | 588499                   | 1,4-5,8-Diethanonaphthalene, 1,4,5,8,9,9,10,10,11,11,12,12-dodecafluoro-1,4,4a,5,8,8a-hexahydro-2,3-dimethyl-.1 |
| 20    | 635681                   | 2-(2-Hydroxy-4-octyloxyphenyl)-5-(4-octyloxyphenyl)pyrimidine.1                                                 |
| 21    | 6426589                  | 2-(4-Methoxyphenyl)amino-5,6-difluoro-3-trifluoromethyl-4-heptafluoropropylthiopyridine.1                       |
| 22    | 10898                    | 2-Bromoethanol.1                                                                                                |
| 23    | 6568                     | 2-Butanol.1                                                                                                     |
| 24    | 29420                    | 2-Ethoxy-1-propanol.1                                                                                           |
| 25    | 634762                   | 2-Ethoxycarbonyl-3-methyl-4-azafluorenone, 2-fluorenylimine.1                                                   |
| 26    | 9737                     | 2-Fluoroethanol.1                                                                                               |
| 27    | 6420594                  | 2-Fluoroformyl-3,3,4,4-tetrafluoro-1,2-oxazetidine.1                                                            |
| 28    | 8019                     | 2-Methoxyethanol.1                                                                                              |
| 29    | 12252                    | 2-Nitroethanol.1                                                                                                |
| 30    | 20483                    | 2,2'-Trithiobisethanol.1                                                                                        |
| 31    | 262                      | 2,3-Butanediol.1                                                                                                |
| 32    | 520778                   | 2,3-Dihydroxybenzoic acid.1                                                                                     |
| 33    | 9570661                  | 2,3-Dioxobutyric acid 2-methyloxime ethyl ester.1                                                               |
| 34    | 1491                     | 2,4-Dihydroxybenzoic acid.1                                                                                     |
| 35    | 292429                   | 2,5-Bis(5-tert-butyl-2-benzoxazolyl)thiophene.1                                                                 |

|    |           |                                                                                                                     |
|----|-----------|---------------------------------------------------------------------------------------------------------------------|
| 36 | 3469      | 2,5-Dihydroxybenzoic acid.1                                                                                         |
| 37 | 9338      | 2,6-Dihydroxybenzoic acid.1                                                                                         |
| 38 | 101642136 | 2',3'-Didehydro-3-de(methoxycarbonyl)-2'-deoxyvobtusine.1                                                           |
| 39 | 534023    | 2H-Benzocyclohepten-2-one, 3,4,4a,5,6,7,8,9-octahydro-.1                                                            |
| 40 | 621281    | 3-(N-Methylanilino)-2-(triphenylsilyl)-2-cyclobuten-1-one.1                                                         |
| 41 | 631965    | 3,4-Dihydroxymandelic acid, ethyl ester, tri-TMS.1                                                                  |
| 42 | 530207    | 3,4-Dihydroxymandelic acid.1                                                                                        |
| 43 | 530365    | 3,4-Dihydroxyphenylglycol, 4TMS derivative.1                                                                        |
| 44 | 6951097   | 3,4-Dihydroxyphenylglycol.1                                                                                         |
| 45 | 5378203   | 4-(4-Ethoxycarbonylbuta-1,3-dienyl)-1-methyl-2,5-diphenyl-1H-pyrrole-3- carboxylic acid, ethyl ester.1              |
| 46 | 624972    | 4-Hydroxy-3-methoxyphenylacetic acid, ethyl ester, PFP.1                                                            |
| 47 | 631974    | 4-Triisopropylsilyloxyhexadecane.1                                                                                  |
| 48 | 632009    | 4-Tripropylsilyloxyhexadecane.1                                                                                     |
| 49 | 635646    | 4,4'-Bis[(4-chlorophenyl)sulfonyl]-1,1'-biphenyl.1                                                                  |
| 50 | 5366461   | 5-Carbethoxysuccinylacetone, O,O,O-tris(trimethylsilyl)-..1                                                         |
| 51 | 632028    | 5,12d-Ethano(furo[2,3,4-mn]oxepino[2,3,4-ed]anthracen-9-ol-2-one), 6-methyl-12acetoxy-2a,3,4,4a,5,7,8a-octahydro-.1 |
| 52 | 11144488  | entry.1                                                                                                             |
| 53 | 11144488  | 5alpha-Cholestan-3-one ethylene acetal.1                                                                            |
| 54 | 22296474  | 5alpha-Cholestan-19-oic acid, 2beta-methoxy-.1                                                                      |
| 55 | 536275    | 9-Desoxo-9-xi-hydroxy-3,7,8,9,12-pentaacetate ingol.1                                                               |
| 56 | 8117      | 111-46-6.1                                                                                                          |
| 57 | 7765      | Acetal.1                                                                                                            |
| 58 | 457194    | alpha-Conidendrin.1                                                                                                 |
| 59 | 86472     | alpha-Tocopherol acetate.1                                                                                          |
| 60 | 632030    | alpha.-Lumicolchicine.1                                                                                             |
| 61 | 597057    | alpha.-T ocopherol-.beta.-D-mannoside.1                                                                             |
| 62 | 632012    | Amodiaquine TMS derivative.1                                                                                        |
| 63 | 6957671   | Amodiaquine.1                                                                                                       |
| 64 | 635660    | Androstane, 17-(2(5H)-oxofuran-4-yl)-3-(t-butyldimethylsilyloxy)-14-(trimethylsilyloxy)-.1                          |
| 65 | 6425581   | Arsine, (oxo)phenyl-, tetramer-.1                                                                                   |
| 66 | 631967    | Benzeneacetic acid, alpha,3,4-tris[(trimethylsilyl)oxy]-, methyl ester.1                                            |
| 67 | 530207    | Benzeneacetic acid.1                                                                                                |
| 68 | 1567      | beta-Mercaptoethanol.1                                                                                              |
| 69 | 6713941   | beta.-Lumicolchicine.1                                                                                              |
| 70 | 94900     | Bis(2-methoxyethyl) carbonate.1                                                                                     |
| 71 | 554502    | Bis[tert-butyl(dimethyl)silyl] sebacate.1                                                                           |
| 72 | 9623      | Carbonyl fluoride.1                                                                                                 |
| 73 | 635667    | Cholest-2-eno[2,3-b]indole.1                                                                                        |

|     |           |                                                                                 |
|-----|-----------|---------------------------------------------------------------------------------|
| 74  | 11987212  | Cobalt, bis(.eta.-5-piperidinylcyclopentadienyl)-.1                             |
| 75  | 519601    | Cyclodecasiloxane, eicosamethyl-.1                                              |
| 76  | 11172     | Cyclononasiloxane.1                                                             |
| 77  | 11170     | Cyclooctasiloxane, hexadecamethyl-.1                                            |
| 78  | 10913     | Cyclopentasiloxane, decamethyl-.1                                               |
| 79  | 634765    | Dibenz[a,h]anthracene, 5,12-diphenyl-.1                                         |
| 80  | 84166     | Diethoxymethyl acetate.1                                                        |
| 81  | 8146      | Diethylene glycol monoethyl ether.1                                             |
| 82  | 3108      | Dipyridamole.1                                                                  |
| 83  | 2117      | DL-alpha-Tocopherol acetate.1                                                   |
| 84  | 519601    | Eicosamethyl-cyclodecasiloxane.1                                                |
| 85  | 22296881  | Estra-1,3,5(10)-trien-17-one, 3,4-bis[(trimethylsilyl)oxy]- (CAS).1             |
| 86  | 22296483  | Estra-1,3,5(10)-triene-7,17-dione, 3-[(trimethylsilyl)oxy]-.1                   |
| 87  | 702       | Ethanol.1                                                                       |
| 88  | 80169     | Ethyl diethoxyacetate.1                                                         |
| 89  | 95630     | Ethyl ethoxyhydroxyacetate.1                                                    |
| 90  | 8025      | Ethyl formate.1                                                                 |
| 91  | 7344      | Ethyl lactate.1                                                                 |
| 92  | 9620      | Fluoroethane.1                                                                  |
| 93  | 3045276   | Galbulin.1                                                                      |
| 94  | 387164927 | gamma.-LUMICOLCHICIN.1                                                          |
| 95  | 13589     | Glycidyl methyl ether.1                                                         |
| 96  | 631978    | Glycine, N-methylsulfonyl-N-(4-chloro-2-methylphenyl)-, 4-benzylpiperidide.1    |
| 97  | 3776      | Isopropyl alcohol.1                                                             |
| 98  | 631961    | Isoproterenol tri-TMS derivative.1                                              |
| 99  | 878       | Methanethiol.1                                                                  |
| 100 | 136386    | Methyltartronic acid.1                                                          |
| 101 | 631966    | N-(Pentafluorobenzylidene)-beta,3,4-tris(trimethylsiloxy)phenylethylamine.1     |
| 102 | 553889    | N-(Trifluoroacetyl)-O,O',O''-tris(trimethylsilyl)norepinephrine.1               |
| 103 | 542733    | N-Methoxyformamide.1                                                            |
| 104 | 641324    | Nickel, bis(1,3-diphenyl-1,3-propanedionato)-.1                                 |
| 105 | 524460    | NOREPINEPHRINE-TETRA TMS.1                                                      |
| 106 | 951       | Norepinephrine.1                                                                |
| 107 | 4113      | O-Methylhydroxylamine                                                           |
| 108 | 319242166 | Phenethylamine, N-methyl-.beta.,3,4-tris(trimethylsiloxy)-.1                    |
| 109 | 553894    | Phosphoric acid, bis[2,3-bis(trimethylsiloxy)propyl] trimethylsilyl ester.1     |
| 110 | 6424160   | Phthalic acid, monoamide, N,N-diheptyl, pentyl ester.1                          |
| 111 | 631963    | Propanoic acid, 3-[bis[(trimethylsilyl)oxy]phosphinyl]-, trimethylsilyl ester.1 |

|     |          |                                                                                                     |
|-----|----------|-----------------------------------------------------------------------------------------------------|
| 112 | 1030     | Propylene glycol.1                                                                                  |
| 113 | 634168   | Pyrrolidine, 4-((N,N-dimethylcarbamoyl)benzyl)triphenylacetyl-.1                                    |
| 114 | 11776    | Rhodium, carbonyl(.eta.5-2,4-cyclopentadien-1-yl)(triphenylphosphine)-.1                            |
| 115 | 439846   | S-1,2-Propanediol.1                                                                                 |
| 116 | 5192     | Sebacic acid.1                                                                                      |
| 117 | 22296892 | Silanamine, N-[(17beta)-3,17-bis[(trimethylsilyl)oxy]estra-1,3,5(10)-trien-2-yl]-1,1,1-trimethyl-.1 |
| 118 | 530365   | Silane.1                                                                                            |
| 119 | 5281     | Stearic acid.1                                                                                      |
| 120 | 632005   | Terbutaline, N-trifluoroacetyl-o,o,o-tris(trimethylsilyl)deriv..1                                   |
| 121 | 167767   | Tetracosamethyl-cyclododecasiloxane.1                                                               |
| 122 | 5380044  | trans-4-Nitro-4'-(octadecyloxy)chalcone.1                                                           |
| 123 | 5379882  | trans,trans-1,1'-(m-Phenylene)bis(3-(p-(methylthio)phenyl)-2-propen-1-one).1                        |
| 124 | 5379880  | trans,trans-1,1'-(p-Phenylene)bis(3-(p-(methylthio)phenyl)-2-propen-1-one).1                        |
| 125 | 31214    | Triethyl orthoformate.1                                                                             |
| 126 | 5363841  | Tris(3-benzyl-2,4-pentanedionato)chromium(iii).1                                                    |
| 127 | 20353    | Vitamin e succinate.1                                                                               |
| 128 | 14985    | Vitamin E.1                                                                                         |
| 129 | 634764   | Xanthine, 8-[3-iodocyclopentyl]-1,3-dipropyl-.1                                                     |
